# Supplementary material for: Are preterm birth and intra-uterine growth restriction more common in Western Australian children of immigrant backgrounds? A population based data linkage study
Source: Springer Nature journal article supplement (doi:10.1186/s12884-019-2437-x), 2019-08-09
Supplement: MOESM1 [file 17054176]

**Supplementary Table S1: Low and middle-income countries**

| Low Income countries |              | Lower Middle-Income countries |                  | Upper Middle-Income countries |              |
|----------------------|--------------|-------------------------------|------------------|-------------------------------|--------------|
| Afghanistan          | Malawi       | Angola                        | Mauritania       | Albania                       | Maldives     |
| Bhutan               | Mali         | Armenia                       | Moldova          | Algeria                       | Mauritius    |
| Bolivia              | Mozambique   | Bangladesh                    | Mongolia         | Argentina                     | Mexico       |
| Borneo               | Nepal        | Burma                         | Morocco          | Belarus                       | Namibia      |
| Burkina Faso         | Palestine    | Cambodia                      | Nicaragua        | Bosnia                        | Nauru        |
| Burundi              | Rwanda       | Cameroon                      | Nigeria          | Botswana                      | Panama City  |
| Central African Rep  | Senegal      | Cape Verde                    | Pakistan         | Brazil                        | Paraguay     |
| Chad                 | Sierra Leone | Colombia                      | Papua New Guinea | Bulgaria                      | Peru         |
| Congo                | Somalia      | Djibouti                      | Philippines      | China                         | Romania      |
| Eritrea              | Tanzania     | Egypt                         | Solomon Islands  | Costa Rica                    | Rumania      |
| Ethiopia             | Togo         | El Salvador                   | Sri Lanka        | Croatia                       | Russia       |
| Gambia               | Uganda       | Ghana                         | Sudan            | Cuba                          | Samoa        |
| Guinea               |              | Guatemala                     | Swaziland        | Dominican Republic            | Serbia       |
| Liberia              |              | Honduras                      | Syria            | Ecuador                       | South Africa |
| Madagascar           |              | India                         | Tajikistan       | Falkland Islands              | Suriname     |
|                      |              | Indonesia                     | Timor            | Fiji                          | Tahiti       |
|                      |              | Ivory Coast                   | Tunisia          | Guyana                        | Thailand     |
|                      |              | Jordan                        | Ukraine          | Iran                          | Tonga        |
|                      |              | Kenya                         | Uzbekistan       | Iraq                          | Turkey       |
|                      |              | Kiribati                      | Vanuatu          | Kazakhstan                    | Tuvalu       |
|                      |              | Kyrgyzstan                    | Vietnam          | Lebanon                       | Venezuela    |
|                      |              | Laos                          | Yemen            | Libya                         | West Indies  |
|                      |              | Lesotho                       | Zambia           | Malaysia                      | Yugoslavia   |
