# Supplementary material for: Are preterm birth and intra-uterine growth restriction more common in Western Australian children of immigrant backgrounds? A population based data linkage study
Source: Springer Nature journal article supplement (doi:10.1186/s12884-019-2437-x), 2019-08-09
Supplement: MOESM2 [file 17054176]

**Supplementary Table S2: High income countries**

| High Income countries |                  |                   |              |                      |                |
|-----------------------|------------------|-------------------|--------------|----------------------|----------------|
| Australia             | Austria          | Bahamas           | Bahrain      | Belgium              | Bermuda        |
| Canada                | Channel Islands  | Chile             | Cook Islands | Cyprus               | Czech Republic |
| Denmark               | Diego Garcia     | Dutch West Indies | England      | Estonia              | Finland        |
| France                | French Polynesia | Germany           | Gibraltar    | Greece               | Greenland      |
| Guadeloupe            | Guam             | Hong Kong         | Hungary      | Iceland              | Ireland        |
| Isle of Man           | Israel           | Italy             | Japan        | Korea                | Kuwait         |
| Latvia                | Liechtenstein    | Lithuania         | Luxembourg   | Malta                | Netherlands    |
| New Caledonia         | New Hebrides     | New Zealand       | Niue Island  | Norway               | Oman           |
| Poland                | Portugal         | Puerto Rico       | Qatar        | Reunion Island       | Saudi Arabia   |
| Scotland              | Seychelles       | Singapore         | Slovakia     | Slovenia             | Spain          |
| Sweden                | Switzerland      | Taiwan            | UK           | United Arab Emirates | Uruguay        |
| USA                   | Virgin Islands   | Wales             |              |                      |                |
